# Supplementary material for: Detection of membrane-bound and soluble antigens by magnetic levitation
Source: Royal Society of Chemistry journal article supplement (doi:10.1039/c7lc00402h), 2017-01-01
Supplement: c7lc00402h1.pdf [file c7lc00402h1.pdf]

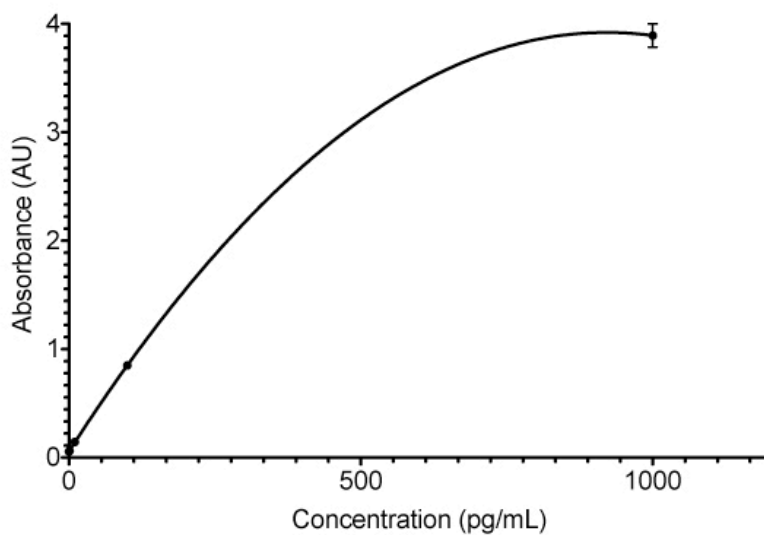

**Supplemental Figure 1. Detection of soluble IL-6 by ELISA** detection of IL=6 by sandwich ELISA was performed as per manufacturer instructions (R&D Systems). The colorimetric reaction was stopped after 30 minutes and the results read using a SpectraMax spectrophotometer at 450 nm.
